# Supplementary material
Source: PubMed Central journal article supplement (PMC10156136)
Supplement: mmc1.pdf [file mmc1.pdf]

# THE LANCET

## Healthy Longevity

### Supplementary appendix

This appendix formed part of the original submission and has been peer reviewed. We post it as supplied by the authors.

Supplement to: Ravussin A, Robertson AH, Wolf A-S, et al. Determinants of humoral and cellular immune responses to three doses of mRNA SARS-CoV-2 vaccines in older adults: a longitudinal cohort study. *Lancet Healthy Longev* 2023; **4**: e188–99.

## **SUPPLEMENTARY MATERIAL**

### **TABLE OF CONTENTS**

|                                                                                                                                                                                                                                    |           |
|------------------------------------------------------------------------------------------------------------------------------------------------------------------------------------------------------------------------------------|-----------|
| <b>Supplementary Methods. IFN-<math>\gamma</math> quantification .....</b>                                                                                                                                                         | <b>2</b>  |
| <b>Supplementary Figure 1. Flow chart of recruitment of participants and study samples in the Senior cohort .....</b>                                                                                                              | <b>3</b>  |
| <b>Supplementary Figure 2. Flow gating strategy for identification of activated CD4<sup>+</sup> and CD8<sup>+</sup> T cells.....</b>                                                                                               | <b>4</b>  |
| <b>Supplementary Figure 3. Histograms of log-transformed immunological outcomes in the Senior cohort ....</b>                                                                                                                      | <b>5</b>  |
| <b>Supplementary Figure 4. Correlation between antibody and CD4+ and CD8+ T cell responses after 2 or 3 vaccine doses .....</b>                                                                                                    | <b>6</b>  |
| <b>Supplementary Figure 5. T cell responses after 2 vaccine doses.....</b>                                                                                                                                                         | <b>7</b>  |
| <b>Supplementary Figure 6. Cross reactive T cell responses to seasonal coronaviruses show correlation with SARS-CoV-2 spike responses and are enhanced after vaccination .....</b>                                                 | <b>8</b>  |
| <b>Supplementary Figure 7. Box plot of anti-RBD antibody levels according to breakthrough infection (BTIs) after the third dose .....</b>                                                                                          | <b>9</b>  |
| <b>Supplementary Table 1. Additional characteristics of Senior cohort participants. ....</b>                                                                                                                                       | <b>10</b> |
| <b>Supplementary Table 2. Reagents for cell stimulation and flow cytometry analysis .....</b>                                                                                                                                      | <b>13</b> |
| <b>Supplementary Table 3. Median anti-RBD antibody levels (BAU/ml) post 2<sup>nd</sup> covid-19 vaccine dose in the Senior cohort (N=299), and median regression analysis to explore factors influencing antibody levels .....</b> | <b>14</b> |
| <b>Supplementary Table 4. Median CD4<sup>+</sup> spike responses (%) post 2nd covid-19 vaccine dose in the Senior cohort (N=90), and median regression analysis to explore factors that influence the response .....</b>           | <b>16</b> |
| <b>Supplementary Table 5. Median CD8<sup>+</sup> spike responses (%) post 2nd covid-19 vaccine dose in the Senior cohort (N=90), and median regression analysis to explore factors that influence the response .....</b>           | <b>18</b> |
| <b>Supplementary Table 6. Median CD8<sup>+</sup> spike responses (%) post 3rd covid-19 vaccine dose in the Senior cohort (N=71), and median regression analysis to explore factors that influence the response .....</b>           | <b>20</b> |
| <b>Supplementary Data on validity and completeness of questionnaire data on vaccination and infection ....</b>                                                                                                                     | <b>22</b> |

*(Ravussin, Robertson and Wolf et al 2023. Determinants of humoral and cellular immune responses to three doses of mRNA SARS-CoV-2 vaccines in older adults: a longitudinal cohort study).*

### **Supplementary Methods. IFN- $\gamma$ quantification**

Supernatants were collected from additional T cell cultures after 72h for IFN- $\gamma$  quantification; sandwich ELISAs were performed by coating plates with 1 $\mu$ g/ml IFN- $\gamma$  capture antibody overnight and blocking for 1h before incubation for 2h with samples at 1:5 dilution. Standard curves were made with 2-fold serial dilutions of recombinant IFN- $\gamma$  in duplicate starting at 500pg/ml. Plates were further incubated with 0.5 $\mu$ g/ml biotinylated mouse anti-human antibody for 1h and 1:5000 diluted streptavidin-horseradish peroxidase (HRP) for 30min. Binding was visualized with 3,3',5,5'-tetramethylbenzidine (TMB). Optical density was measured at 405nm with a EL808 plate reader (Agilent).

**Supplementary Figure 1. Flow chart of recruitment of participants and study samples in the Senior cohort.** Individuals were recruited in two rounds in December 2020 and May 2021. All participants who consented to participation in December 2020 (488/1373) were immediately invited to donate blood samples (#). Time of sampling corresponding to the period prior to vaccination (\*) of healthy older adults, relative to the national vaccination campaign, and with a second dose (\*\*) and third dose (\*\*\*) respectively. Note that the denominator of the response rates decreases slightly from questionnaire 2 through to 8 due to loss to follow-up.

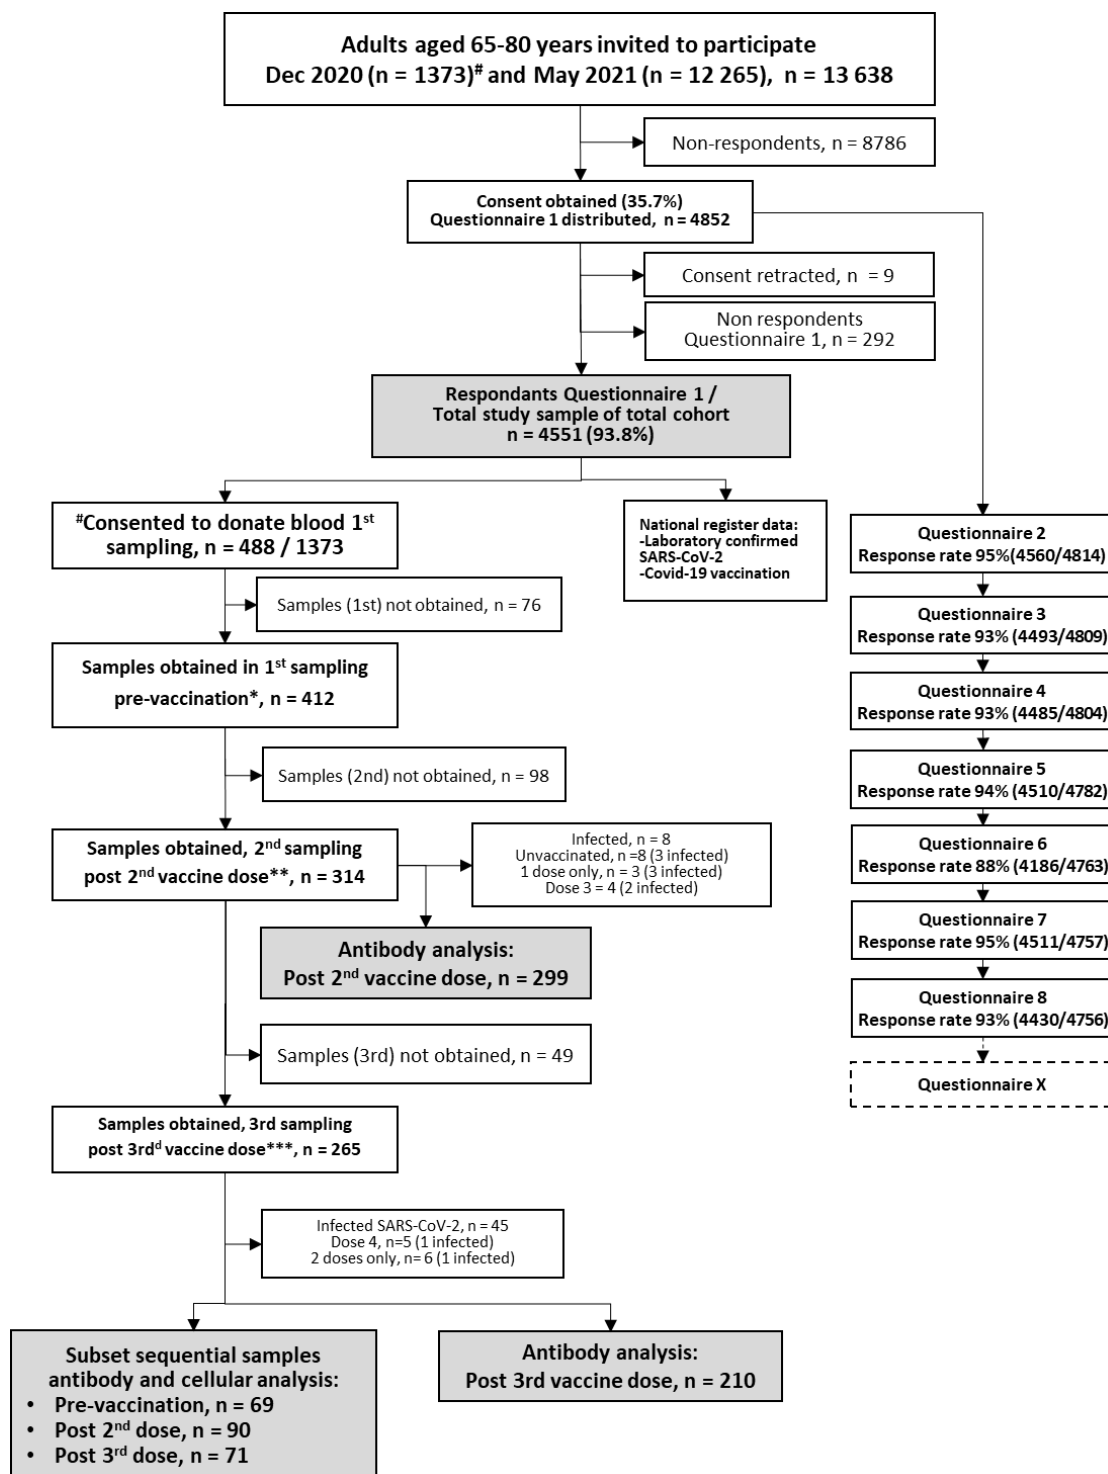

(Ravussin, Robertson and Wolf et al 2023. Determinants of humoral and cellular immune responses to three doses of mRNA SARS-CoV-2 vaccines in older adults: a longitudinal cohort study).

Supplementary Figure 2. Flow gating strategy for identification of activated CD4<sup>+</sup> and CD8<sup>+</sup> T cells.

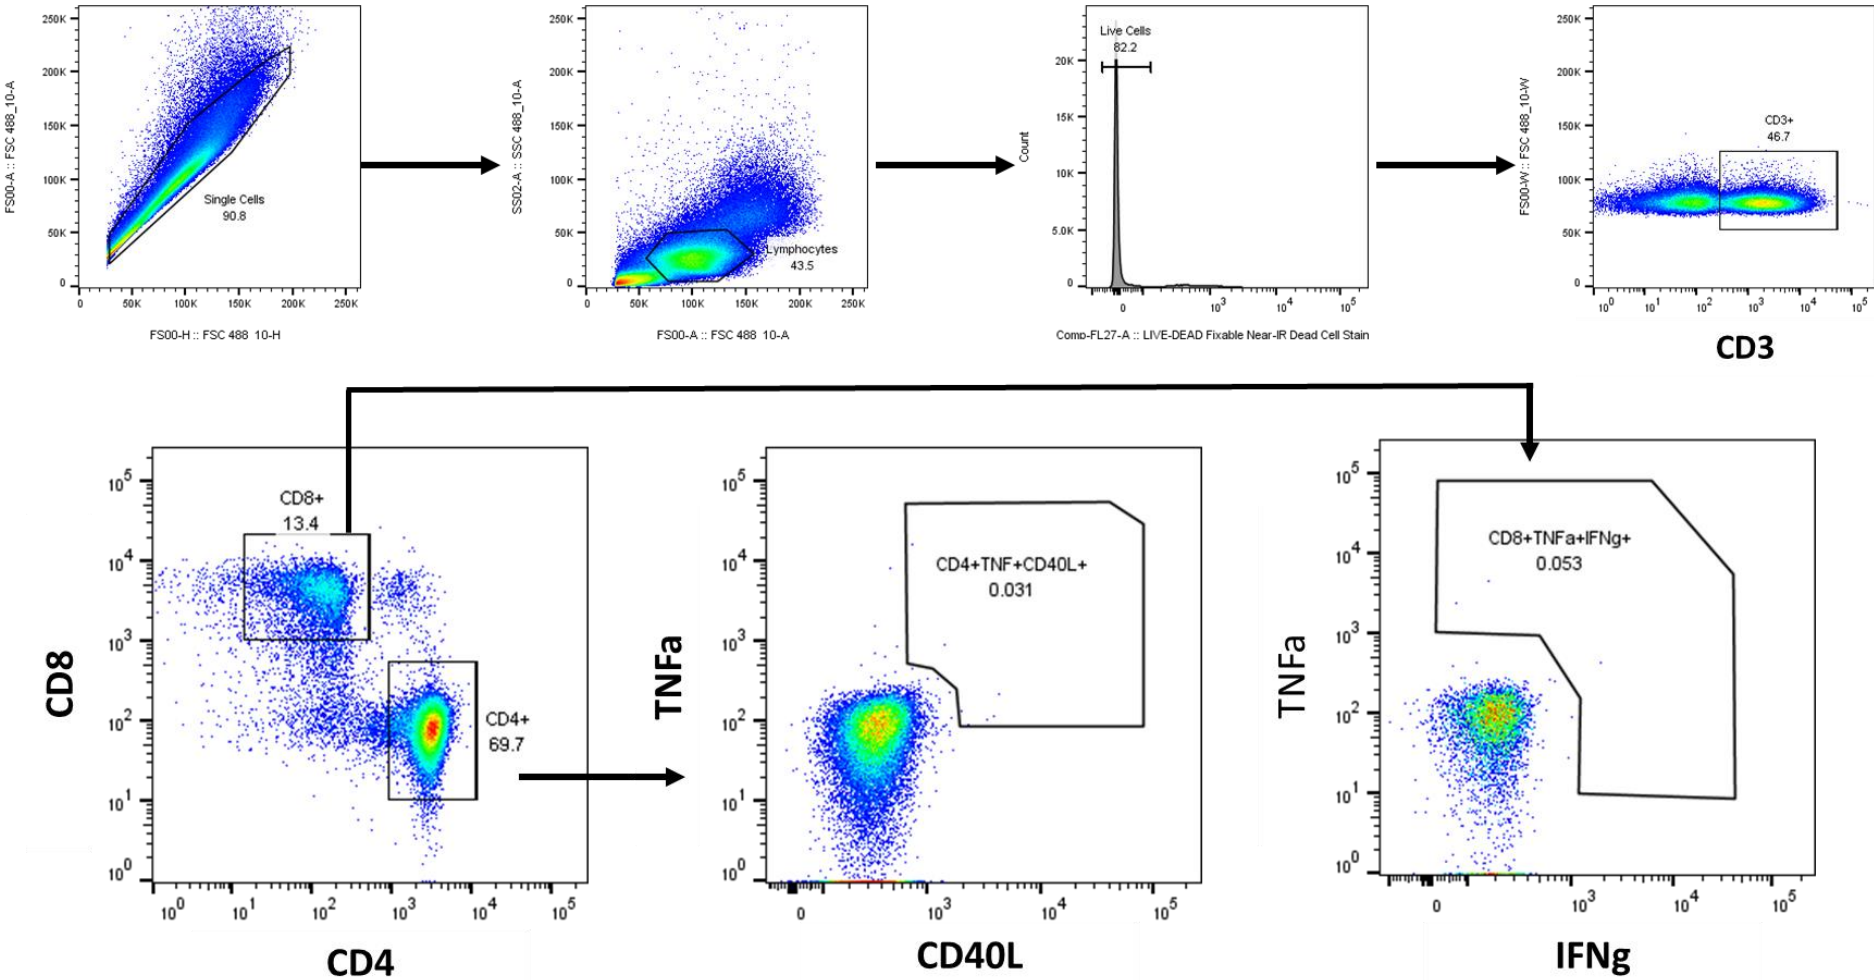

(Ravussin, Robertson and Wolf et al 2023. Determinants of humoral and cellular immune responses to three doses of mRNA SARS-CoV-2 vaccines in older adults: a longitudinal cohort study).

**Supplementary Figure 3. Histograms of log-transformed immunological outcomes in the Senior cohort.** A) IgG anti-RBD antibody levels after dose 2, log<sub>10</sub> transformed BAU/ml (n=299), B) RBD antibody levels after dose 3, log<sub>10</sub> transformed BAU/ml (n=210), C) Normalised log<sub>10</sub> CD4% spike responses after dose 2 (n=90), D) Normalised log<sub>10</sub> CD8% spike responses after dose 2 (n=90), E) Normalised log<sub>10</sub> CD4% spike responses after dose 3 (n=71), F) Normalised log<sub>10</sub> CD8% spike responses after dose 3 (n=71)

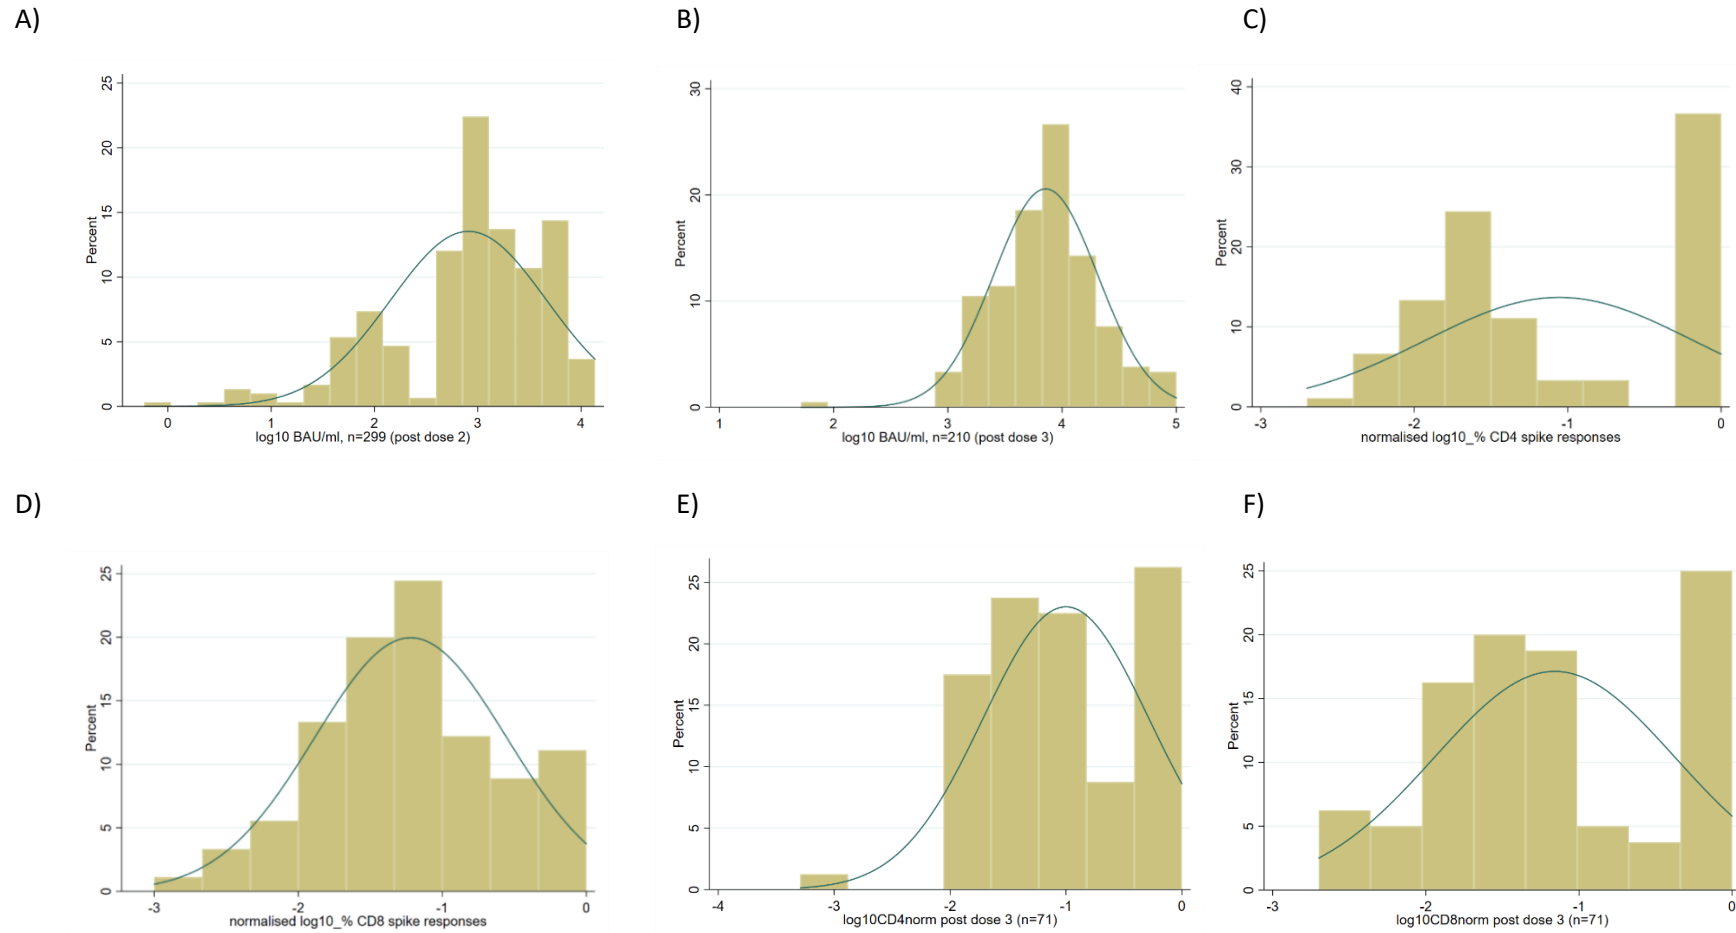

(Ravussin, Robertson and Wolf et al 2023. Determinants of humoral and cellular immune responses to three doses of mRNA SARS-CoV-2 vaccines in older adults: a longitudinal cohort study).

**Supplementary Figure 4. Correlation between antibody and CD4 and CD8 T cell responses after 2 or 3 vaccine doses.** Antibody levels (BAU/ml) did not correlate with CD4+ (A) or CD8+ (B) T cell responses after 2 vaccine doses, or with CD8+ T cell responses after 3 vaccine doses (C). Correlations calculated by Pearson correlation coefficients,  $r$  and  $p$  values shown on plots (all non-significant).

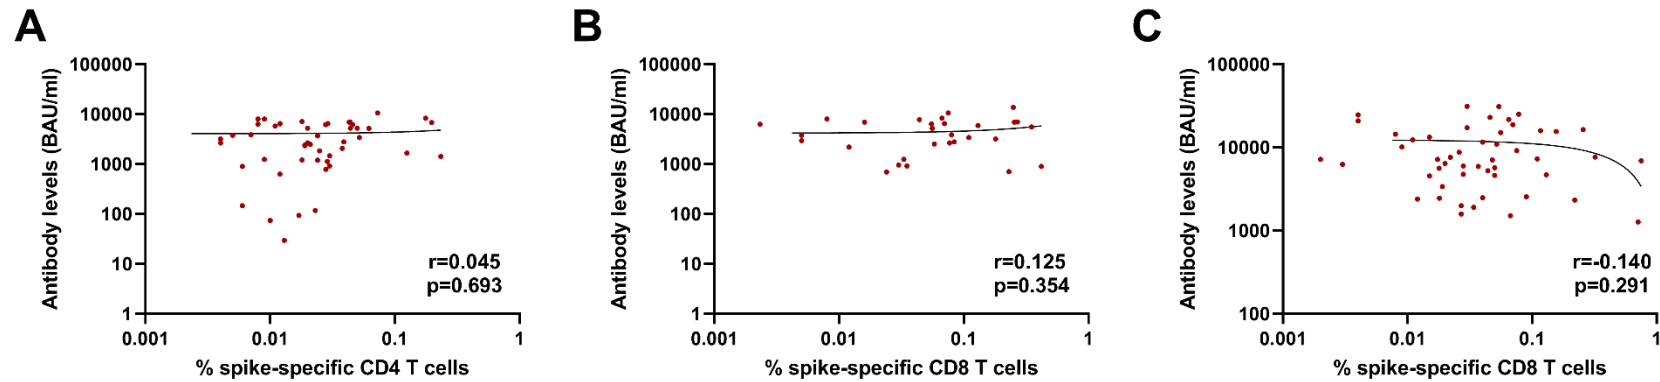

(Ravussin, Robertson and Wolf et al 2023. Determinants of humoral and cellular immune responses to three doses of mRNA SARS-CoV-2 vaccines in older adults: a longitudinal cohort study).

**Supplementary Figure 5. T cell responses after 2 vaccine doses.** (A) IFN- $\gamma$  levels in cell supernatants after 72hrs of PBMC stimulation with SARS-CoV-2 spike peptides before (empty) and after (striated) two vaccine doses. CD4<sup>+</sup> (B-D) and CD8<sup>+</sup> (E-G) T cell responses after 2 vaccine doses to the Alpha and Delta VOCs. All comparisons (B and E) are between the unstimulated control and the spike, VOC reference, and VOC variant peptides (results indicated by asterisks). T cell responses to the VOC mutated and reference sequences correlated strongly for both Alpha (C and F) and Delta (D and G) VOCs. Box-and-whisker plots show the median, IQR, and 5<sup>th</sup> and 95<sup>th</sup> percentiles; all individuals are plotted as dots. R and p values are indicated on each correlation plot. \* p<0.05, \*\* p<0.01, \*\*\* p<0.001, \*\*\*\* p<0.0001.

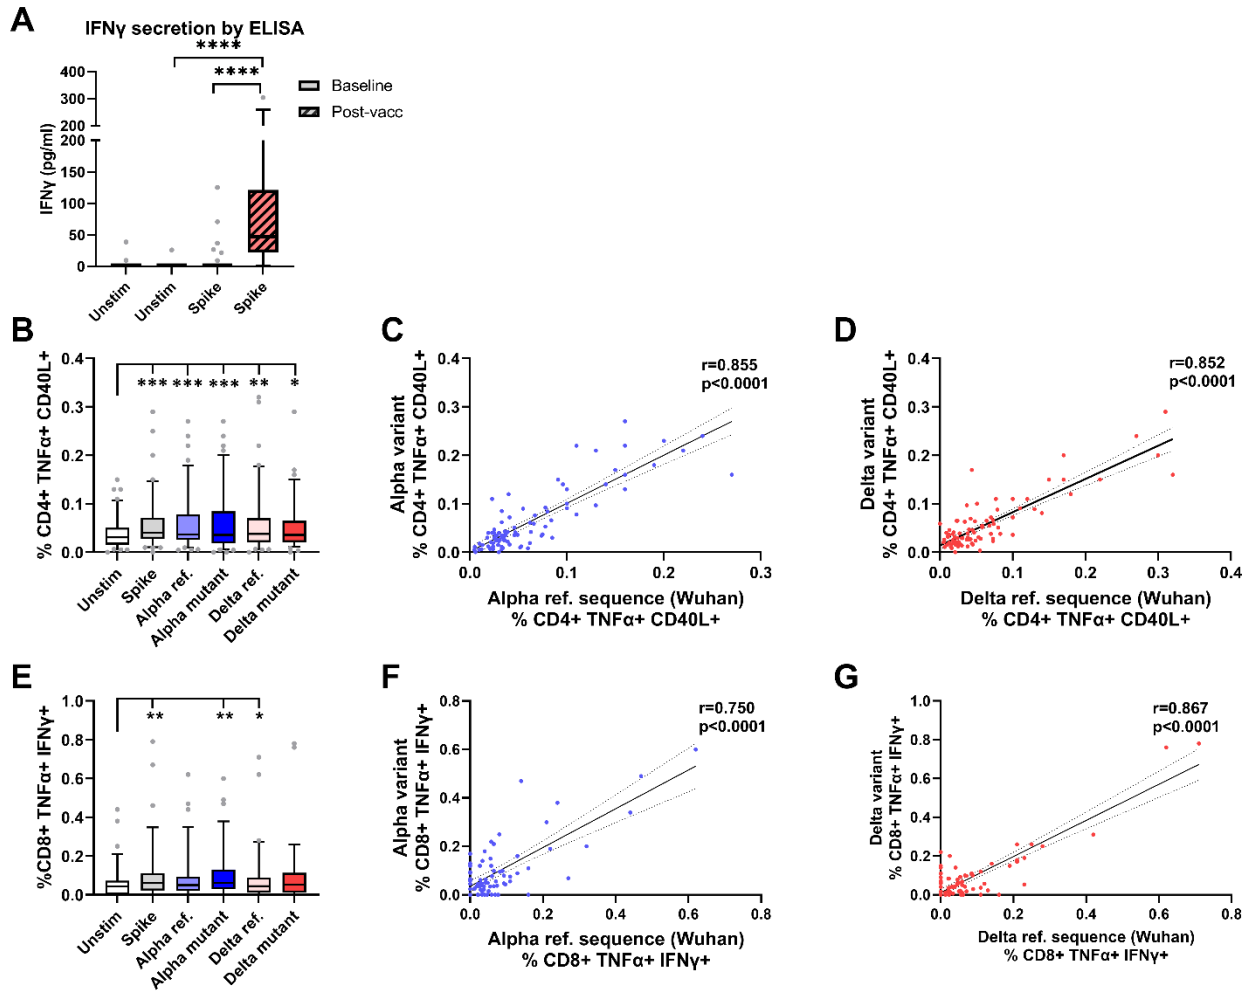



(Ravussin, Robertson and Wolf et al 2023. Determinants of humoral and cellular immune responses to three doses of mRNA SARS-CoV-2 vaccines in older adults: a longitudinal cohort study).

**Supplementary Figure 6: Cross reactive T cell responses to seasonal coronaviruses show correlation with SARS-CoV-2 spike responses and are enhanced after vaccination.** (A) CD4<sup>+</sup> and (D) CD8<sup>+</sup> T cell responses to pooled HCoV spike peptides (green) before (empty boxes) and after (striated boxes) 2 vaccine doses. SARS-CoV-2 WT spike-specific responses correlate with HCoV spike-specific responses for both CD4<sup>+</sup> (B) and CD8<sup>+</sup> (E) T cells but not with HCoV nucleocapsid-specific responses (C and F).

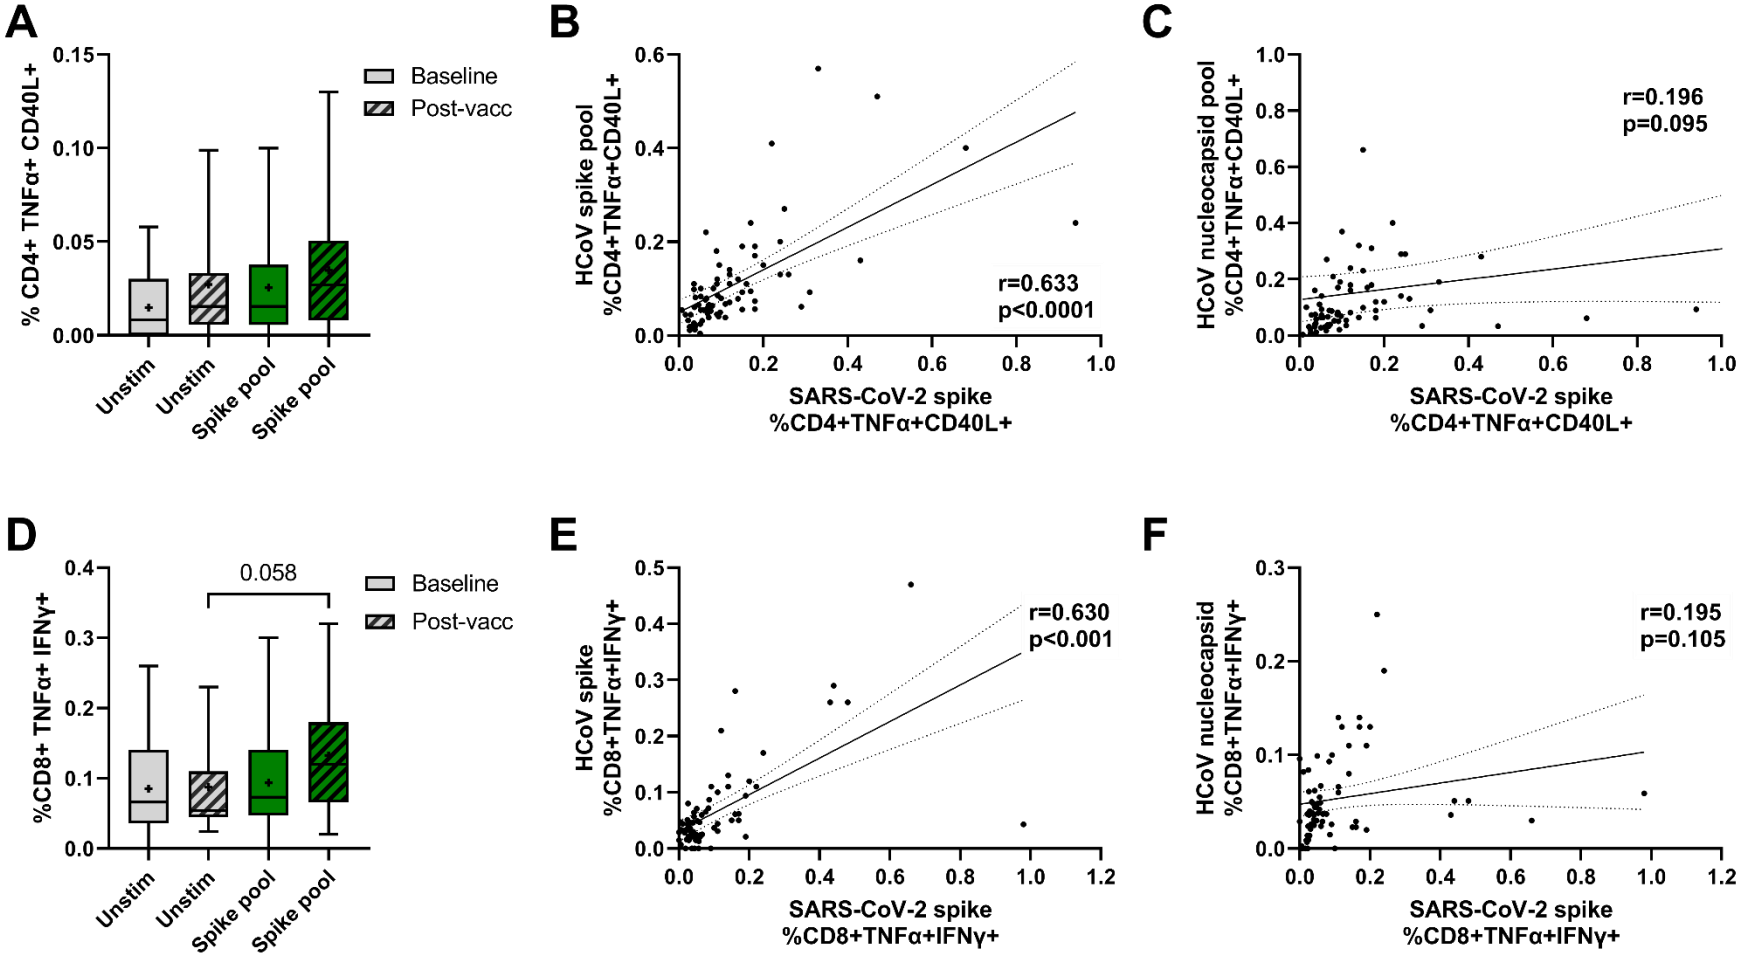

(Ravussin, Robertson and Wolf et al 2023. Determinants of humoral and cellular immune responses to three doses of mRNA SARS-CoV-2 vaccines in older adults: a longitudinal cohort study).

**Supplementary Figure 7: Box plot of anti-RBD antibody levels according to breakthrough infections (BTIs) after the third dose.**

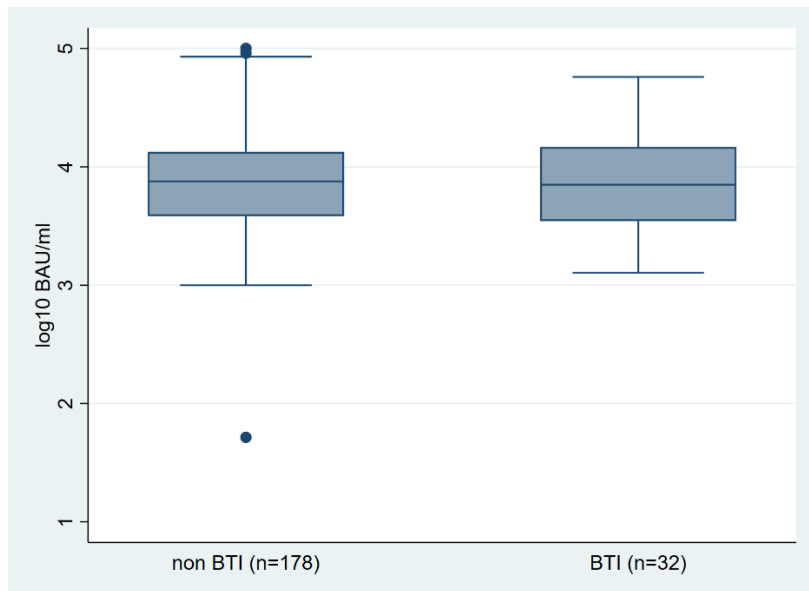

**Supplementary Table 1. Additional characteristics of Senior cohort participants.** Characteristics are shown for the total cohort sample (N=4 551), and subsets for antibody (N=299) and cellular analysis (N =90) respectively

| Characteristic                                                                                                                                                                                                                                                   | Study sample<br>N= 4551 <sup>a</sup> | Antibody<br>subset<br>N=299 <sup>b</sup> | Cellular<br>subset,<br>N= 90 <sup>c</sup> |
|------------------------------------------------------------------------------------------------------------------------------------------------------------------------------------------------------------------------------------------------------------------|--------------------------------------|------------------------------------------|-------------------------------------------|
| <b>Alcohol intake, amount</b> (n=4275/ n=267/ n=83) <sup>d</sup>                                                                                                                                                                                                 |                                      |                                          |                                           |
| Per time at weekends, > 4 units, n (%)                                                                                                                                                                                                                           | 847 (19.8)                           | 59 (22.1)                                | 18 (21.7)                                 |
| Per time at weekends, ≤ 4 units, n (%)                                                                                                                                                                                                                           | 3155 (73.8)                          | 202 (75.7)                               | 60 (72.3)                                 |
| Missing, n(%)                                                                                                                                                                                                                                                    | 273 (6.4)                            | 12 (4.0)                                 | 5 (5.6)                                   |
| Per time on weekdays, > 4 units, n (%)                                                                                                                                                                                                                           | 90 (2.1)                             | 7 (2.6)                                  | 0 (0)                                     |
| Per time on weekdays, ≤ 4 units, n (%)                                                                                                                                                                                                                           | 3912 (91.5)                          | 256 (95.9)                               | 77 (92.8)                                 |
|                                                                                                                                                                                                                                                                  | 273 (6.4)                            | 12 (4.0)                                 | 6 (7.2)                                   |
| <b>Alcohol intake, frequency</b>                                                                                                                                                                                                                                 |                                      |                                          |                                           |
| > 3 times per week, n (%)                                                                                                                                                                                                                                        | 1022 (22.5)                          | 73 (24.4)                                | 15 (16.7)                                 |
| 2-3 times per week, n (%)                                                                                                                                                                                                                                        | 1463 (32.1)                          | 95 (31.8)                                | 33 (36.7)                                 |
| < 2 times per week, n (%)                                                                                                                                                                                                                                        | 1548 (34.0)                          | 99 (33.1)                                | 30 (33.3)                                 |
| Never, n (%)                                                                                                                                                                                                                                                     | 276 (6.1)                            | 20 (6.7)                                 | 7 (7.8)                                   |
| Missing, n (%)                                                                                                                                                                                                                                                   | 242 (5.3)                            | 12 (4)                                   | 5 (5.6)                                   |
| <b>Smoking</b>                                                                                                                                                                                                                                                   |                                      |                                          |                                           |
| Daily smoker, n (%)                                                                                                                                                                                                                                              | 221 (4.9)                            | 9 (3.0)                                  | 2 (2.2)                                   |
| Occasional smoker, n (%)                                                                                                                                                                                                                                         | 135 (3.0)                            | 7 (2.3)                                  | 2 (2.2)                                   |
| Missing, n (%)                                                                                                                                                                                                                                                   | 232 (5.1)                            | 11 (3.7)                                 | 4 (4.4)                                   |
| <b>Frailty index</b>                                                                                                                                                                                                                                             |                                      |                                          |                                           |
| 1) (Unintentional weight loss) In the last year, have you lost more than 10 pounds unintentionally (i.e., not due to dieting or exercise)? yes=1, no=0                                                                                                           |                                      |                                          |                                           |
| Yes, n (%)                                                                                                                                                                                                                                                       | 137 (3.0)                            | 9 (3.0)                                  | 1 (1.1)                                   |
| Missing, n (%)                                                                                                                                                                                                                                                   | 68 (1.5)                             | 4 (1.3)                                  | 2 (2.2)                                   |
| 2) (Low activity) We would like to know about the type and amount of physical activity you do in your daily life. How often do you engage in activities that require a low or moderate level of energy such as gardening, cleaning the car, or going for a walk? |                                      |                                          |                                           |
| 1-3 times a month/hardly ever/never = 1, n (%)                                                                                                                                                                                                                   | 299 (6.6)                            | 16 (5.4)                                 | 4 (4.4)                                   |
| ≥ once a week = 0, n (%)                                                                                                                                                                                                                                         | 4 232 (93.0)                         | 283 (94.6)                               | 86 (95.6)                                 |
| Missing, n (%)                                                                                                                                                                                                                                                   | 20 (0.4)                             | 0 (0)                                    | 0 (0)                                     |
| 3) (Exhaustion) During the past month have you had too little energy to do things/activities you enjoy doing? yes=1, no=0                                                                                                                                        |                                      |                                          |                                           |
| Yes, n (%)                                                                                                                                                                                                                                                       | 815 (17.9)                           | 51 (17.1)                                | 11 (12.2)                                 |
| Missing, n (%)                                                                                                                                                                                                                                                   | 26 (0.6)                             | 0 (0)                                    | 0 (0)                                     |
| <b>Global Activity Limitation Index (GALI)</b>                                                                                                                                                                                                                   |                                      |                                          |                                           |
| Do you experience limitations in daily activities due to chronic illness, health condition or limited function?                                                                                                                                                  |                                      |                                          |                                           |
| No, n (%)                                                                                                                                                                                                                                                        | 3947 (86.7)                          | 261 (87.3)                               | 83 (92.2)                                 |
| Yes, n (%)                                                                                                                                                                                                                                                       | 584 (12.8)                           | 34 (11.4)                                | 6 (6.7)                                   |
| Missing, n (%)                                                                                                                                                                                                                                                   | 20 (0.4)                             | 4 (1.3)                                  | 1 (1.1)                                   |
| If yes, have these limitations lasted for 6 months of longer? (n = 584 / n=34 / n=6)                                                                                                                                                                             |                                      |                                          |                                           |
| No, n (%)                                                                                                                                                                                                                                                        | 89 (15.2)                            | 5 (14.7)                                 | 0 (0)                                     |

(Ravussin, Robertson and Wolf et al 2023. Determinants of humoral and cellular immune responses to three doses of mRNA SARS-CoV-2 vaccines in older adults: a longitudinal cohort study).

|                                                                                                                                                                                                           |              |            |           |
|-----------------------------------------------------------------------------------------------------------------------------------------------------------------------------------------------------------|--------------|------------|-----------|
| Yes, n (%)                                                                                                                                                                                                | 489 (83.7)   | 29 (85.3)  | 6 (100.0) |
| Missing, n (%)                                                                                                                                                                                            | 6 (1.0)      | 0 (0)      | 0 (0)     |
| If yes, do you experience severe limitation or moderate limitation? (n=489 / n=29 / n=6)                                                                                                                  |              |            |           |
| Severe limitation, n (%)                                                                                                                                                                                  | 131 (26.8)   | 11 (37.9)  | 2 (33.3)  |
| Moderate limitation, n (%)                                                                                                                                                                                | 352 (72.0)   | 18 (62.1)  | 4 (66.7)  |
| Missing, n (%)                                                                                                                                                                                            | 6 (1.2)      | 0 (0)      | 0 (0)     |
| <i>Index: Limitation min. 6 months, 3 categories</i>                                                                                                                                                      |              |            |           |
| No limitation, n (%)                                                                                                                                                                                      | 4036 (88.7)  | 266 (89.0) | 83 (92.2) |
| Moderate limitation, n (%)                                                                                                                                                                                | 352 (7.7)    | 18 (6.0)   | 4 (4.4)   |
| Severe limitation, n (%)                                                                                                                                                                                  | 131 (2.9)    | 11 (3.7)   | 2 (2.2)   |
| Missing, n(%)                                                                                                                                                                                             | 32 (0.7)     | 4 (1.3)    | 1 (1.1)   |
| <b>Physical Exercise (≥10 min. per day)</b>                                                                                                                                                               |              |            |           |
| ≥2 times per week, n (%)                                                                                                                                                                                  | 3793 (83.3)  | 256 (85.6) | 76 (84.4) |
| <2 times per week, n (%)                                                                                                                                                                                  | 526 (11.6)   | 31 (10.4)  | 10 (11.1) |
| <i>In detail:</i>                                                                                                                                                                                         |              |            |           |
| How often do you exercise in your spare time? By exercise we mean for e.g. going for a walk, ski-ing, swimming, training, at least 10 minutes per day. Include any training to and from work. On average. |              |            |           |
| Never, n (%)                                                                                                                                                                                              | 125 (2.7)    | 2 (0.7)    | 2 (2.2)   |
| Less than 1 time per week, n (%)                                                                                                                                                                          | 401 (8.8)    | 29 (9.7)   | 8 (8.9)   |
| 2-3 times per week, n (%)                                                                                                                                                                                 | 1 599 (35.1) | 103 (34.4) | 33 (36.7) |
| 4-5 times per week, n (%)                                                                                                                                                                                 | 1 049 (23.0) | 69 (23.1)  | 17 (18.9) |
| Every day, n (%)                                                                                                                                                                                          | 1 145 (25.2) | 84 (28.1)  | 26 (28.9) |
| Missing, n (%)                                                                                                                                                                                            | 232 (5.1)    | 12 (4.0)   | 4 (4.4)   |
| <i>(If more than "never", n =4194 / n=285 / n=84)</i>                                                                                                                                                     |              |            |           |
| How hard do you exercise?                                                                                                                                                                                 |              |            |           |
| Don't cause sweating or breathlessness, n (%)                                                                                                                                                             | 2 069 (49.3) | 140 (49.1) | 30 (35.7) |
| Cause sweating and/or breathlessness, n (%)                                                                                                                                                               | 2 013 (48.0) | 139 (48.8) | 54 (64.3) |
| Complete exhaustion, n (%)                                                                                                                                                                                | 90 (2.1)     | 4 (1.4)    | 0 (0)     |
| Missing, n (%)                                                                                                                                                                                            | 22 (0.5)     |            | 0 (0)     |
| <b>Living situation</b>                                                                                                                                                                                   |              |            |           |
| Living alone, n (%)                                                                                                                                                                                       | 1 400 (30.8) | 98 (32.8)  | 27 (30.0) |
| Missing, n (%)                                                                                                                                                                                            | 229 (5.0)    | 11 (3.7)   | 2 (2.2)   |
| <b>Housing (multiple options possible)</b>                                                                                                                                                                |              |            |           |
| Apartment, n (%)                                                                                                                                                                                          | 2 784 (61.2) | 185 (61.9) | 59 (65.6) |
| Detached house, n (%)                                                                                                                                                                                     | 985 (21.6)   | 62 (20.7)  | 16 (17.8) |
| Terraced house, n (%)                                                                                                                                                                                     | 479 (10.5)   | 29 (9.7)   | 9 (10.0)  |
| Long-term care facility (LTCF), n (%)                                                                                                                                                                     | 6 (0.1)      | 0 (0)      | 0 (0)     |
| Multi-generational home, n (%)                                                                                                                                                                            | 70 (1.5)     | 6 (2.0)    | 2 (2.2)   |
| Other types of housing, n (%)                                                                                                                                                                             | 50 (1.1)     | 8 (2.7)    | 4 (4.4)   |
| Missing, n (%)                                                                                                                                                                                            | 229 (5.0)    | 12 (4.0)   | 2 (2.2)   |
| <b>Higher education, n (%)</b>                                                                                                                                                                            |              |            |           |
| < High school, n (%)                                                                                                                                                                                      | 275 (6.0)    | 23 (7.7)   | 6 (6.7)   |
| High school, n (%)                                                                                                                                                                                        | 639 (14.0)   | 47 (15.7)  | 18 (20.0) |
| College ≤4 years, n (%)                                                                                                                                                                                   | 1409 (31.0)  | 93 (31.1)  | 26 (28.9) |
| >4 years college, n (%)                                                                                                                                                                                   | 1458 (32.0)  | 87 (29.1)  | 24 (26.7) |
| Other, n (%)                                                                                                                                                                                              | 233 (5.1)    | 19 (6.4)   | 5 (5.6)   |

(Ravussin, Robertson and Wolf et al 2023. Determinants of humoral and cellular immune responses to three doses of mRNA SARS-CoV-2 vaccines in older adults: a longitudinal cohort study).

|                                                           |             |            |           |
|-----------------------------------------------------------|-------------|------------|-----------|
| Missing, n (%)                                            | 537 (11.8)  | 30 (10.0)  | 11 (12.2) |
| <b>Current work situation (multiple options possible)</b> |             |            |           |
| Retired, n (%)                                            | 3674 (80.7) | 257 (86.0) | 79 (87.8) |
| Still working/partially retired, n (%)                    | 849 (18.7)  | 50 (16.7)  | 15 (16.7) |
| Fully retired, n (%)                                      | 3674 (80.7) | 236 (78.9) | 79 (87.8) |
| Rehabilitation/disabled/sick leave, n (%)                 | 55 (1.2)    | 3 (1.0)    | 0 (0)     |
| Employed in public sector, n (%)                          | 234 (5.1)   | 13 (4.3)   | 5 (5.6)   |
| Employed in private sector, n (%)                         | 327 (7.2)   | 12 (4.0)   | 5 (5.6)   |
| Self-employed, n (%)                                      | 263 (5.8)   | 23 (7.7)   | 5 (5.6)   |
| Freelancer, n (%)                                         | 63 (1.4)    | 2 (0.7)    | 0 (0)     |
| Voluntary work/charity, n (%)                             | 75 (1.6)    | 9 (3.0)    | 3 (3.3)   |
| Stay at home (unpaid), n (%)                              | 16 (0.4)    | 1 (0.3)    | 0 (0)     |
| Other unpaid work, n (%)                                  | 20 (0.4)    | 0 (0)      | 0 (0)     |
| Missing, n (%)                                            | 266 (5.8)   | 10 (3.3)   | 2 (2.2)   |
| <b>Chronic diseases/ conditions<sup>e</sup></b>           |             |            |           |
| 1 disease/ condition, n (%)                               | 1438 (31.6) | 97 (32.4)  | 32 (35.6) |
| 2 diseases/ conditions, n (%)                             | 513 (11.3)  | 33 (11.0)  | 11 (12.2) |
| 3 diseases/ conditions, n (%)                             | 161 (3.5)   | 5 (1.7)    | 1 (1.1)   |
| 4 diseases/ conditions, n (%)                             | 50 (1.1)    | 4 (1.3)    | 0 (0)     |
| 5 diseases/ conditions, n (%)                             | 16 (0.4)    | 0 (0)      | 0 (0)     |
| ≥ 6 diseases/ conditions, n (%)                           | 6 (0.1)     | 0 (0)      | 0 (0)     |
| “Any other condition” <sup>f</sup>                        | 1046 (23.0) | 55 (18.4)  | 13 (14.4) |
| Missing, n (%)                                            | 31 (0.7)    | 12 (4.0)   | 1 (1.1)   |
| At least 1 chronic disease – excluding previous cancer    | 1775 (39.0) | 118 (39.5) | 32 (35.6) |
| Missing, n (%)                                            | 108 (2.4)   | 6 (2.0)    | 1 (1.1)   |
| <b>Fracture in past 5 years<sup>k</sup></b>               |             |            |           |
| Yes, n (%)                                                | 493 (10.8)  | 29 (9.7)   | 6 (6.7)   |
| Missing, n (%)                                            | 14 (0.3)    | 1 (0.3)    | 0 (0)     |

<sup>a</sup>percentages shown as proportion of N= 4551 unless otherwise stated

<sup>b</sup>percentages shown as proportion of N= 299 unless otherwise stated

<sup>c</sup>percentages shown as proportion of N= 90 unless otherwise stated

<sup>d</sup>n based on participants who answered they drink alcohol

<sup>e</sup>asthma, other chronic lung disease, diabetes, myocardial infarction, heart condition or cardiovascular disease, stroke (anytime), chronic liver disease, chronic kidney disease, neurological disease, cancer (anytime), immunosuppressed. Note that high blood pressure is not included as a chronic disease/condition

<sup>f</sup>open question in Q1 following the specified list of conditions <sup>e</sup>

(Ravussin, Robertson and Wolf et al).

**Supplementary Table 2. Reagents for cell stimulation and flow cytometry analysis**

| <b>Stimulation condition</b>   | <b>Product name</b>                                        | <b>Catalogue number</b> | <b>Company</b>           |
|--------------------------------|------------------------------------------------------------|-------------------------|--------------------------|
| Spike WT                       | PepTivator SARS-CoV-2 Prot_S                               | 130-126-700             | Miltenyi Biotec          |
| Alpha VOC                      | PepTivator SARS-CoV-2 Prot_S B.1.1.7 Reference Pool        | 130-127-841             | Miltenyi Biotec          |
|                                | PepTivator SARS-CoV-2 Prot_S B.1.1.7 Mutation Pool         | 130-127-844             | Miltenyi Biotec          |
| Delta VOC                      | PepTivator SARS-CoV-2 Prot_S B.1.617.2 Reference Pool      | 130-128-761             | Miltenyi Biotec          |
|                                | PepTivator SARS-CoV-2 Prot_S B.1.617.2 Mutation Pool       | 130-128-763             | Miltenyi Biotec          |
| Omicron VOC                    | PepTivator SARS-CoV-2 Prot_S B.1.1.529/BA.1 Reference Pool | 130-129-927             | Miltenyi Biotec          |
|                                | PepTivator SARS-CoV-2 Prot_S B.1.1.529/BA.1 Mutation Pool  | 130-129-928             | Miltenyi Biotec          |
| HCoV spike pool                | PepMix HCoV-OC43 (Spike Glycoprotein)                      | PM-OC43-S-2             | JPT Peptide Technologies |
|                                | PepMix HCoV-NL63 (Spike Glycoprotein)                      | PM-NL63-S-1             | JPT Peptide Technologies |
|                                | PepMix HCoV-HKU1 (Spike Glycoprotein)                      | PM-HKU1-S-1             | JPT Peptide Technologies |
| HCoV nucleocapsid pool         | PepMix HCoV-OC43 (NCAP)                                    | PM-OC43-NCAP-1          | JPT Peptide Technologies |
|                                | PepMix HCoV-NL63 (NCAP)                                    | PM-NL63-NCAP-1          | JPT Peptide Technologies |
|                                | PepMix HCoV-HKU1 (NCAP)                                    | PM-HKU1-NCAP-1          | JPT Peptide Technologies |
| CMV                            | PepTivator CMV pp65                                        | 130-093-435             | Miltenyi Biotec          |
| CytoStim                       | CytoStim, human                                            | 130-092-172             | Miltenyi Biotec          |
| <b>Flow cytometry staining</b> |                                                            |                         |                          |
| Surface antibodies             | CD3-Brilliant Violet 605                                   | 563219                  | Beckton Dickinson        |
|                                | CD4-eFluor450                                              | 48-0047-42              | ThermoFisher Scientific  |
|                                | CD8-AlexaFluor 488                                         | 53-0086-42              | ThermoFisher Scientific  |
|                                | Fixable Live/Dead Near-IR                                  | L34976A                 | Invitrogen               |
| Intracellular antibodies       | CD40L-Brilliant Violet 510                                 | 310830                  | BioLegend                |
|                                | IFN $\gamma$ -Brilliant Violet 711                         | 502540                  | BioLegend                |
|                                | TNF $\alpha$ -Phycoerythrin (PE)                           | 559321                  | Beckton Dickinson        |
|                                | CD69-Allophycocyanin (APC)                                 | 555533                  | Beckton Dickinson        |
| <b>Sandwich ELISA</b>          | Mouse anti-human recombinant IFN $\gamma$ capture antibody | M700A                   | ThermoFisher Scientific  |
|                                | Human IFN $\gamma$ Recombinant Protein                     | 2983-19-65              | ThermoFisher Scientific  |
|                                | Biotinylated mouse anti-human IFN $\gamma$                 | M701B                   | ThermoFisher Scientific  |
|                                | Streptavidin horseradish peroxidase                        | 7105-05                 | AH Diagnostics           |

**Supplementary Table 3. Median anti-RBD antibody levels (BAU/ml) post 2<sup>nd</sup> covid-19 vaccine dose in the Senior cohort (N=299), and median regression analysis to explore factors influencing antibody levels.** p-values <0.05 are shown in bold.

| EXPOSURE/ FACTOR                             | Category       | Study sample<br>N=299* |      | Anti-spike antibody<br>levels<br><br>Median, BAU/ml<br>(IQR) | Univariate median regression |              | Multivariate median<br>regression** |              |
|----------------------------------------------|----------------|------------------------|------|--------------------------------------------------------------|------------------------------|--------------|-------------------------------------|--------------|
|                                              |                | n                      | %    |                                                              | Coefficient (95%CI)<br>***   | p-value      | Coefficient(95%CI)<br>***           | p-value      |
| <b>CATEGORICAL VARIABLES</b>                 |                |                        |      |                                                              |                              |              |                                     |              |
| <b>Age categories (years)</b>                | 65-70          | 126                    | 42 % | 1662 (800, 4318)                                             | <b>Ref</b>                   |              | Ref                                 |              |
|                                              | 71-75          | 109                    | 36 % | 765 (159, 2015)                                              | <b>-939 (-1390, -487)</b>    | <b>0.000</b> | -314 (-947, 319)                    | 0.330        |
|                                              | 76-80          | 94                     | 31 % | 757 (162, 1794)                                              | <b>-929 (-1459, -400)</b>    | <b>0.001</b> | -131 (-879, 617)                    | 0.731        |
| <b>Sex</b>                                   | Female         | 152                    | 51 % | 1123 (654, 2973)                                             | Ref                          |              | Ref                                 |              |
|                                              | Male           | 147                    | 49 % | 908 (173, 2685)                                              | -215 (-563, 132)             | 0.223        | -168 (-711, 375)                    | 0.543        |
| <b>Vaccine type, dose 2</b>                  | BNT-162b2      | 212                    | 71 % | 813 (149, 1979)                                              | <b>Ref</b>                   |              | <b>Ref</b>                          |              |
|                                              | mRNA-1273      | 87                     | 29 % | 2019 (866, 5752)                                             | <b>1200 (670, 1729)</b>      | <b>0.000</b> | <b>1494 (889, 2098)</b>             | <b>0.000</b> |
| <b>Chronic condition</b>                     | No             | 148                    | 50 % | 1105 (650, 3860)                                             | Ref                          |              | Ref                                 |              |
|                                              | Yes            | 146                    | 50 % | 900 (200, 2400)                                              | -208 (-642, 226)             | 0.347        | -219 (-777, 338)                    | 0.439        |
| <b>Asthma/ chronic lung condition</b>        | No             | 265                    | 90 % | 1064 (580, 2797)                                             | Ref                          |              | Ref                                 |              |
|                                              | Yes            | 31                     | 10 % | 819 (609, 2447)                                              | -245 (-934, 445)             | 0.486        | -219 (-1177, 740)                   | 0.654        |
| <b>Chronic heart/ cardiovascular disease</b> | No             | 266                    | 89 % | 980 (600, 2934)                                              | Ref                          |              | Ref                                 |              |
|                                              | Yes            | 32                     | 11 % | 1132 (369, 1949)                                             | 206 (-470, 882)              | 0.549        | 593 (-271, 1457)                    | 0.178        |
| <b>Hypertension</b>                          | No             | 193                    | 65 % | 1099 (597, 3012)                                             | Ref                          |              | Ref                                 |              |
|                                              | Yes            | 104                    | 35 % | 906 (606, 2241)                                              | -191 (-647, 265)             | 0.411        | -160 (-765, 445)                    | 0.604        |
| <b>Diabetes</b>                              | No             | 276                    | 92 % | 1015 (612, 2866)                                             | Ref                          |              | Ref                                 |              |
|                                              | Yes            | 23                     | 8 %  | 775 (89, 1912)                                               | -249 (-1060, 562)            | 0.546        | 360 (-633, 1353)                    | 0.476        |
| <b>Cancer (anytime)</b>                      | No             | 248                    | 83 % | 1083 (641, 2973)                                             | Ref                          |              | Ref                                 |              |
|                                              | Yes            | 50                     | 17 % | 703 (173, 2154)                                              | -385 (-944, 174)             | 0.176        | -33 (-728, 662)                     | 0.926        |
| <b>Immunosuppressed</b>                      | No             | 286                    | 96 % | 1043 (600, 2797)                                             | Ref                          |              | Ref                                 |              |
|                                              | Yes            | 11                     | 4 %  | 881 (29, 2685)                                               | -181 (-1318, 956)            | 0.754        | -226 (-1651, 1199)                  | 0.755        |
| <b>Obesity (≥ 30.0 kg/m<sup>2</sup>)</b>     | No             | 255                    | 89 % | 984 (612, 2797)                                              | Ref                          |              | Ref                                 |              |
|                                              | Yes            | 33                     | 11 % | 1123 (196, 3500)                                             | 140 (-608, 887)              | 0.713        | -125 (-968, 719)                    | 0.771        |
| <b>Frailty Index</b>                         | Not frail      | 230                    | 78 % | 1102 (612, 3178)                                             | Ref                          |              | Ref                                 |              |
|                                              | Prefrail/frail | 64                     | 22 % | 860 (162, 2099)                                              | -240 (-742, 262)             | 0.348        | -195 (-809, 418)                    | 0.532        |

(Ravussin, Robertson and Wolf et al).

|                                         |                        |           |              |                                      |                                                 |                |                                               |                |
|-----------------------------------------|------------------------|-----------|--------------|--------------------------------------|-------------------------------------------------|----------------|-----------------------------------------------|----------------|
| <b>Global Activity Limitation Index</b> | Not limited<br>Limited | 266<br>29 | 90 %<br>10 % | 1015 (597, 2934)<br>1075 (676, 2388) | Ref<br>51 (-645, 747)                           | 0.885          | Ref<br>-485 (-1340, 371)                      | 0.266          |
| <b>CONTINUOUS VARIABLES</b>             | <b>Unit</b>            | <b>n</b>  |              |                                      | <b>Coefficient</b>                              | <b>p-value</b> | <b>Coefficient</b>                            | <b>p-value</b> |
| <b>Age</b>                              | Per year               | 299       |              | NA <sup>#</sup>                      | <b>Ref (per year)</b><br><b>-68 (-126, -11)</b> | <b>0.020</b>   | Ref (per year)<br>-17 (-92, 58)               | 0.657          |
| <b>Time since vaccination</b>           | Per day                | 299       |              | NA                                   | <b>Ref (per day)</b><br><b>-18 (-23, -13)</b>   | <b>0.000</b>   | <b>Ref (per day)</b><br><b>-21 (-26, -16)</b> | <b>0.000</b>   |
| <b>BMI</b>                              | Per kg/m <sup>2</sup>  | 295       |              | NA                                   | Ref (per kg/m <sup>2</sup> )<br>8 (-51, 66)     | 0.793          | Ref (per kg/m <sup>2</sup> )<br>17 (-54, 87)  | 0.638          |

\* for some factors data was missing for up to 11 participants. These were excluded in the analysis.

\*\* adjusted for age (continuous variable), time since vaccination (continuous variable), sex and vaccine type (BNT-162b2 vs mRNA-1273), (unless the covariate was the exposure variable).

\*\*\* interpretation: the coefficient is the difference in the median BAU/ml titre between the groups being compared, or per unit (continuous variables).

#not applicable



**Supplementary Table 4. Median CD4<sup>+</sup> spike responses (%) post 2nd covid-19 vaccine dose in the Senior cohort (N=90), and median regression analysis to explore factors that influence the response.**

| EXPOSURE/ FACTOR                          | Category  | Study sample* | CD4spike, % cells    | Univariate median regression |         | Multivariate median regression ** |         |
|-------------------------------------------|-----------|---------------|----------------------|------------------------------|---------|-----------------------------------|---------|
|                                           |           | N=90          | Median % (IQR)       | Coefficient (95%CI)          | p-value | Coefficient (95%CI)               | p-value |
| CATEGORICAL VARIABLES                     |           |               |                      |                              |         |                                   |         |
| Age categories (years)                    | 65-70     | 44 (48.9%)    | 0.007 (0, 0.019)     | Ref (per cat)                |         | Ref                               |         |
|                                           | 71-75     | 30 (33.3%)    | 0.019 (0, 0.03)      | 0.013 (0.001, 0.025)         | 0.04    | 0.015 (0.001, 0.029)              | 0.03    |
|                                           | 76-80     | 16 (17.8%)    | 0.013 (0, 0.022)     | 0.003 (-0.012, 0.018)        | 0.70    | 0.009 (-0.007, 0.025)             | 0.27    |
| Sex                                       | Female    | 44 (48.9%)    | 0.006 (0, 0.028)     | Ref                          |         | Ref                               |         |
|                                           | Male      | 46 (51.1%)    | 0.012 (0, 0.024)     | 0.006 (-0.005, 0.017)        | 0.30    | 0.006 (-0.005, 0.017)             | 0.27    |
| Vaccine type, dose 2                      | BNT-162b2 | 59 (65.6%)    | 0.012 (0, 0.025)     | Ref                          |         | Ref                               |         |
|                                           | mRNA-1273 | 31 (34.4%)    | 0.008 (0, 0.028)     | -0.004 (-0.017, 0.009)       | 0.53    | -0.003 (-0.014, 0.009)            | 0.67    |
| Chronic condition                         | No        | 45 (50.6%)    | 0.009 (0, 0.024)     | Ref                          |         | Ref                               |         |
|                                           | Yes       | 44 (49.4%)    | 0.011 (0, 0.017)     | 0.002 (-0.008, 0.012)        | 0.70    | 0.003 (-0.008, 0.013)             | 0.61    |
| Asthma/chronic lung condition             | No        | 79 (89.8%)    | 0.01 (0, 0.024)      | Ref                          |         | Ref                               |         |
|                                           | Yes       | 9 (10.2%)     | 0.006 (0, 0.028)     | -0.004 (-0.021, 0.013)       | 0.65    | 0.003 (-0.015, 0.021)             | 0.76    |
| Chronic heart/ cardiovascular condition   | No        | 81 (91%)      | 0.009 (0, 0.025)     | Ref                          |         | Ref                               |         |
|                                           | Yes       | 8 (9%)        | 0.022 (0.01, 0.034)  | 0.015 (-0.004, 0.034)        | 0.12    | 0.008 (-0.011, 0.027)             | 0.41    |
| Hypertension                              | No        | 58 (64.4%)    | 0.01 (0, 0.028)      | Ref                          |         | Ref                               |         |
|                                           | Yes       | 32 (35.6%)    | 0.012 (0, 0.026)     | 0.002 (-0.010, 0.014)        | 0.74    | -0.001 (-0.012, 0.009)            | 0.81    |
| Diabetes                                  | No        | 86 (95.6%)    | 0.011 (0, 0.028)     | Ref                          |         | Ref                               |         |
|                                           | Yes       | 4 (4.4%)      | 0.003 (0.001, 0.012) | -0.007 (-0.034, 0.020)       | 0.61    | -0.004 (-0.031, 0.024)            | 0.80    |
| Cancer (anytime)                          | No        | 72 (80.9%)    | 0.009 (0, 0.024)     | Ref                          |         | Ref                               |         |
|                                           | Yes       | 17 (19.1%)    | 0.012 (0, 0.043)     | 0.003 (-0.012, 0.018)        | 0.69    | 0.001 (-0.014, 0.017)             | 0.88    |
| Immunosuppression                         | No        | 86 (95.6%)    | 0.011 (0, 0.028)     | Ref                          |         | Ref                               |         |
|                                           | Yes       | 4 (4.4%)      | 0.007 (0, 0.017)     | 0.002 (-0.026, 0.030)        | 0.89    | 0.009 (-0.020, 0.038)             | 0.54    |
| Obesity ( $\geq 30.0$ kg/m <sup>2</sup> ) | No        | 75 (86.2%)    | 0.01 (0, 0.026)      | Ref                          |         | Ref                               |         |
|                                           | Yes       | 12 (13.8%)    | 0.011 (0, 0.027)     | 0.002 (-0.013, 0.017)        | 0.79    | -0.001 (-0.018, 0.016)            | 0.88    |

(Ravussin, Robertson and Wolf et al).

|                                         |                       |            |                  |                              |                |                              |                |
|-----------------------------------------|-----------------------|------------|------------------|------------------------------|----------------|------------------------------|----------------|
| <b>Frailty Index</b>                    | Not frail             | 73 (83%)   | 0.008 (0, 0.028) | Ref                          |                | Ref                          |                |
|                                         | Prefrail/frail        | 15 (17%)   | 0.011 (0, 0.024) | 0.003 (-0.012, 0.018)        | 0.69           | 0.004 (-0.009, 0.018)        | 0.53           |
| <b>Global Activity Limitation Index</b> | Not limited           | 83 (93.3%) | 0.011 (0, 0.028) | Ref                          |                | Ref                          |                |
|                                         | Limited               | 6 (6.7%)   | 0.003 (0, 0.026) | -0.007 (-0.030, 0.016)       | 0.55           | -0.003 (-0.022, 0.017)       | 0.80           |
|                                         |                       |            |                  |                              |                |                              |                |
| <b>CONTINUOUS VARIABLES</b>             | <b>Unit</b>           | <b>n</b>   |                  | <b>Coefficient</b>           | <b>p-value</b> | <b>Coefficient</b>           | <b>p-value</b> |
| <b>Age</b>                              | Per year              | 90         |                  | Ref<br>0.001 (-0.000, 0.003) | 0.09           | Ref<br>0.001 (-0.001, 0.002) | 0.50           |
| <b>Time since vaccination</b>           | Per day               | 90         |                  | Ref<br>0.000 (-0.000, 0.000) | 0.56           | Ref<br>0.000 (-0.000, 0.000) | 0.60           |
| <b>BMI</b>                              | Per kg/m <sup>2</sup> | 87         |                  | Ref<br>0.000 (-0.002, 0.001) | 0.82           | Ref<br>0.000 (-0.002, 0.001) | 0.76           |

\*for some factors, data was missing for 1, 2 or 3 participants. These were excluded in the analysis.

\*\* adjusted for age (continuous variable), sex and vaccine type (BNT-162b2 vs mRNA-1273), unless the covariate was the exposure variable.

\*\*\*interpretation: the coefficient is the difference in the median % response between the groups being compared, or per unit (continuous variables).

**Supplementary Table 5. Median CD8<sup>+</sup> spike responses (%) post 2nd covid-19 vaccine dose in the Senior cohort (N=90), and median regression analysis to explore factors that influence the response.**

|                                                |           | Study sample* n=90 | CD8spike, % cells    | Univariate median regression |         | Multivariate median regression** |         |
|------------------------------------------------|-----------|--------------------|----------------------|------------------------------|---------|----------------------------------|---------|
| EXPOSURE/ FACTOR                               | Category  | n (%)              | Median % (IQR)       | Coefficient (95%CI)<br>***   | p-value | Coefficient (95%CI)<br>***       | p-value |
| <b>CATEGORICAL VARIABLES</b>                   |           |                    |                      |                              |         |                                  |         |
| <b>Age categories (years)</b>                  | 65-70     | 44 (48.9%)         | 0.043 (0.009, 0.093) | Ref                          |         | Ref                              |         |
|                                                | 71-75     | 30 (33.3%)         | 0.048 (0.023, 0.084) | 0.005 (-0.029, 0.039)        | 0.77    | 0.007 (-0.029, 0.043)            | 0.70    |
|                                                | 76-80     | 16 (17.8%)         | 0.025 (0.007, 0.119) | -0.019 (-0.061, 0.023)       | 0.38    | -0.016 (-0.058, 0.026)           | 0.45    |
| <b>Sex</b>                                     | Female    | 44 (48.9%)         | 0.039 (0.018, 0.093) | Ref                          |         | Ref                              |         |
|                                                | Male      | 46 (51.1%)         | 0.043 (0.008, 0.089) | 0.000 (-0.030, 0.030)        | 1.00    | 0.000 (-0.030, 0.031)            | 0.99    |
| <b>Vaccine type, dose 2</b>                    | BNT-162b2 | 59 (65.6%)         | 0.042 (0.016, 0.090) | Ref                          |         | Ref                              |         |
|                                                | mRNA-1273 | 31 (34.4%)         | 0.044 (0.010, 0.080) | 0.002 (-0.032, 0.036)        | 0.91    | 0.000 (-0.030, 0.031)            | 0.99    |
| <b>Chronic condition</b>                       | No        | 45 (50.6%)         | 0.044 (0.015, 0.084) | Ref                          |         | Ref                              |         |
|                                                | Yes       | 44 (49.4%)         | 0.05 (0.014, 0.093)  | 0.013 (-0.020, 0.046)        | 0.44    | 0.011 (-0.021, 0.043)            | 0.49    |
| <b>Asthma/chronic lung condition</b>           | No        | 79 (89.8%)         | 0.042 (0.014, 0.089) | Ref                          |         | Ref                              |         |
|                                                | Yes       | 9 (10.2%)          | 0.077 (0.020, 0.119) | 0.035 (-0.018, 0.088)        | 0.20    | 0.044 (-0.011, 0.099)            | 0.11    |
| <b>Chronic heart /cardiovascular condition</b> | No        | 81 (91%)           | 0.044 (0.014, 0.089) | Ref                          |         | Ref                              |         |
|                                                | Yes       | 8 (9%)             | 0.021 (0.010, 0.159) | -0.023 (-0.076, 0.030)       | 0.39    | -0.019 (-0.072, 0.035)           | 0.49    |
| <b>Hypertension</b>                            | No        | 58 (64.4%)         | 0.038 (0.010, 0.077) | Ref                          |         | Ref                              |         |
|                                                | Yes       | 32 (35.6%)         | 0.062 (0.021, 0.145) | 0.027 (-0.010, 0.063)        | 0.14    | 0.024 (-0.012, 0.060)            | 0.19    |
| <b>Diabetes</b>                                | No        | 86 (95.6%)         | 0.043 (0.014, 0.089) | Ref                          |         | Ref                              |         |
|                                                | Yes       | 4 (4.4%)           | 0.05 (0.034, 0.119)  | 0.014 (-0.060, 0.088)        | 0.71    | 0.011 (-0.062, 0.085)            | 0.76    |
| <b>Cancer (anytime)</b>                        | No        | 72 (80.9%)         | 0.043 (0.013, 0.090) | Ref                          |         | Ref                              |         |
|                                                | Yes       | 17 (19.1%)         | 0.062 (0.020, 0.089) | 0.018 (-0.022, 0.058)        | 0.38    | 0.025 (-0.013, 0.062)            | 0.20    |
| <b>Immunosuppression</b>                       | No        | 86 (95.6%)         | 0.043 (0.014, 0.089) | Ref                          |         | Ref                              |         |
|                                                | Yes       | 4 (4.4%)           | 0.049 (0.001, 0.108) | 0.052 (-0.020, 0.124)        | 0.16    | 0.059 (-0.016, 0.133)            | 0.12    |
| <b>Obesity (≥ 30.0 kg/m<sup>2</sup>)</b>       | No        | 75 (86.2%)         | 0.046 (0.014, 0.096) | Ref                          |         | Ref                              |         |
|                                                | Yes       | 12 (13.8%)         | 0.034 (0.014, 0.064) | -0.011 (-0.059, 0.037)       | 0.65    | -0.014 (-0.059, 0.031)           | 0.54    |

(Ravussin, Robertson and Wolf et al).

|                                         |                       |            |                      |                               |                |                               |                |
|-----------------------------------------|-----------------------|------------|----------------------|-------------------------------|----------------|-------------------------------|----------------|
| <b>Frailty Index</b>                    | Not frail             | 73 (83%)   | 0.044 (0.014, 0.090) | Ref                           |                | Ref                           |                |
|                                         | Prefrail/frail        | 15 (17%)   | 0.026 (0.006, 0.077) | -0.018 (-0.062, 0.026)        | 0.42           | -0.013 (-0.052, 0.027)        | 0.53           |
| <b>Global Activity Limitation Index</b> | Not limited           | 83 (93.3%) | 0.044 (0.014, 0.089) | Ref                           |                | Ref                           |                |
|                                         | Limited               | 6 (6.7%)   | 0.038 (0.020, 0.090) | 0.005 (-0.057, 0.067)         | 0.87           | -0.005 (-0.065, 0.056)        | 0.88           |
|                                         |                       |            |                      |                               |                |                               |                |
| <b>CONTINUOUS VARIABLES</b>             | <b>Unit</b>           | <b>n</b>   | <b>Unit</b>          | <b>Coefficient (95CI%)</b>    | <b>p-value</b> | <b>Coefficient (95CI%)</b>    | <b>p-value</b> |
| <b>Age</b>                              | Per year              | 90         |                      | Ref<br>0.000 (-0.004, 0.004)  | 0.90           | Ref<br>0.001 (-0.003, 0.005)  | 0.70           |
| <b>Time since vaccination</b>           | Per day               | 90         |                      | Ref<br>0.000 (-0.001, 0.001)  | 0.83           | Ref<br>0.000 (-0.001, 0.001)  | 0.53           |
| <b>BMI</b>                              | Per kg/m <sup>2</sup> | 87         |                      | Ref<br>-0.001 (-0.005, 0.003) | 0.53           | Ref<br>-0.001 (-0.005, 0.002) | 0.48           |

\*for some factors, data was missing for 1, 2 or 3 participants. These were excluded in the analysis.

\*\* adjusted for age (continuous variable), sex and vaccine type (BNT-162b2 vs mRNA-1273), unless the covariate was the exposure variable.

\*\*\*interpretation: the coefficient is the difference in the median % response between the groups being compared, or per unit (continuous variables).

**Supplementary Table 6. Median CD8<sup>+</sup> spike responses (%) post 3rd covid-19 vaccine dose in the Senior cohort (N=71), and median regression analysis to explore factors that influence the response.**

| EXPOSURE/ FACTOR                        | Category                | Study sample n=71* | CD8spike % cells<br>Median % (IQR) | Univariate median regression |         | Multivariate median regression** |         |
|-----------------------------------------|-------------------------|--------------------|------------------------------------|------------------------------|---------|----------------------------------|---------|
|                                         |                         |                    |                                    | Coefficient (95CI%)<br>***   | p-value | Coefficient (95CI%)<br>***       | p-value |
| <b>CATEGORICAL VARIABLES</b>            |                         |                    |                                    |                              |         |                                  |         |
| Age categories (years)                  | 65-70                   | 36 (50.7%)         | 0.027 (0.004, 0.066)               | Ref                          |         | Ref                              |         |
|                                         | 71-75                   | 23 (32.4%)         | 0.022 (0.000, 0.040)               | -0.005 (-0.035, 0.026)       | 0.75    | 0.002 (-0.029, 0.032)            | 0.92    |
|                                         | 76-80                   | 12 (16.9%)         | 0.04 (0.009, 0.100)                | 0.019 (-0.019, 0.057)        | 0.32    | 0.021 (-0.016, 0.059)            | 0.26    |
| Sex                                     | Female                  | 34 (47.9%)         | 0.017 (0.002, 0.054)               | Ref                          |         | Ref                              |         |
|                                         | Male                    | 37 (52.1%)         | 0.03 (0.010, 0.050)                | 0.013 (-0.010, 0.035)        | 0.26    | 0.012 (-0.008, 0.033)            | 0.23    |
| Vaccine type, dose 3                    | BNT-162b2               | 52 (73.2%)         | 0.027 (0.003, 0.054)               | Ref                          |         | Ref****                          |         |
|                                         | mRNA-1273               | 19 (26.8%)         | 0.031 (0.017, 0.054)               | 0.004 (-0.021, 0.029)        | 0.75    | 0.006 (-0.016, 0.029)            | 0.56    |
| Vaccine type, combinations              | BNT-162b2 x3            | 43 (60.6%)         | 0.026 (0.002, 0.052)               | Ref                          |         | Ref                              |         |
|                                         | mRNA-1273 x3            | 12 (16.9%)         | 0.026 (0.018, 0.049)               | 0.005 (-0.028, 0.038)        | 0.76    | 0.005 (-0.025, 0.036)            | 0.74    |
|                                         | BNT-162b2 x2 +mRNA-1273 | 7 (9.9%)           | 0.040 (0.000, 0.067)               | 0.014 (-0.027, 0.055)        | 0.50    | 0.011 (-0.024, 0.045)            | 0.54    |
|                                         | mRNA-1273x2 +BNT-162b2  | 9 (12.7%)          | 0.03 (0.004, 0.065)                | 0.004 (-0.033, 0.041)        | 0.83    | 0.001 (-0.030, 0.032)            | 0.97    |
| Chronic condition                       | No                      | 40 (56.3%)         | 0.017 (0.003, 0.046)               | Ref                          |         | Ref                              |         |
|                                         | Yes                     | 31 (43.7%)         | 0.037 (0.006, 0.090)               | 0.02 (-0.005, 0.042)         | 0.11    | 0.009 (-0.012, 0.030)            | 0.41    |
| Asthma/ chronic lung condition          | No                      | 64 (91.4%)         | 0.025 (0.004, 0.051)               | Ref                          |         | Ref                              |         |
|                                         | Yes                     | 6 (8.6%)           | 0.037 (0.026, 0.220)               | 0.01 (-0.043, 0.063)         | 0.71    | 0.019 (-0.032, 0.071)            | 0.46    |
| Chronic heart/ cardiovascular condition | No                      | 64 (91.4%)         | 0.024 (0.004, 0.052)               | Ref                          |         | Ref                              |         |
|                                         | Yes                     | 6 (8.6%)           | 0.049 (0.030, 0.710)               | 0.026 (-0.065, 0.117)        | 0.57    | 0.011 (-0.079, 0.100)            | 0.81    |
| Hypertension                            | No                      | 43 (60.6%)         | 0.019 (0.004, 0.070)               | Ref                          |         | Ref                              |         |
|                                         | Yes                     | 28 (39.4%)         | 0.029 (0.005, 0.045)               | 0.011 (-0.016, 0.038)        | 0.43    | 0.002 (-0.022, 0.025)            | 0.88    |
| Diabetes                                | No                      | 68 (95.8%)         | 0.028 (0.004, 0.053)               | Ref                          |         | Ref                              |         |
|                                         | Yes                     | 3 (4.2%)           | 0.027 (0.006, 0.257)               | -0.001 (-0.070, 0.068)       | 0.98    | 0.008 (-0.055, 0.070)            | 0.81    |
| Cancer (anytime)                        | No                      | 57 (80.3%)         | 0.027 (0.006, 0.050)               | Ref                          |         | Ref                              |         |
|                                         | Yes                     | 14 (19.7%)         | 0.028 (0.000, 0.067)               | 0.003 (-0.027, 0.033)        | 0.84    | 0.004 (-0.025, 0.032)            | 0.80    |

(Ravussin, Robertson and Wolf et al).

|                                                          |                       |            |                      |                              |                |                              |                |
|----------------------------------------------------------|-----------------------|------------|----------------------|------------------------------|----------------|------------------------------|----------------|
| <b>Immunosuppression</b>                                 | No                    | 69 (97.2%) | 0.027 (0.004, 0.054) | Ref                          |                | Ref                          |                |
|                                                          | Yes                   | 2 (2.8%)   | 0.02 (0.000, 0.040)  | 0.013 (-0.057, 0.083)        | 0.71           | 0.005 (-0.064, 0.074)        | 0.88           |
| <b>Obesity (<math>\geq 30.0</math> kg/m<sup>2</sup>)</b> | No                    | 61 (87.1%) | 0.028 (0.004, 0.054) | Ref                          |                | Ref                          |                |
|                                                          | Yes                   | 9 (12.9%)  | 0.026 (0.003, 0.037) | -0.002 (-0.034, 0.030)       | 0.90           | -0.001 (-0.033, 0.031)       | 0.97           |
| <b>Frailty Index</b>                                     | Not frail             | 57 (82.6%) | 0.026 (0.004, 0.052) | Ref                          |                | Ref                          |                |
|                                                          | Prefrail/frail        | 12 (17.4%) | 0.028 (0.005, 0.046) | 0.002 (-0.028, 0.032)        | 0.90           | 0.000 (-0.027, 0.027)        | 0.98           |
| <b>Global Activity Limitation Index</b>                  | Not limited           | 65 (92.9%) | 0.028 (0.004, 0.054) | Ref                          |                | Ref                          |                |
|                                                          | Limited               | 5 (7.1%)   | 0.006 (0.000, 0.027) | -0.022 (-0.064, 0.020)       | 0.30           | -0.007 (-0.050, 0.037)       | 0.76           |
|                                                          |                       |            |                      |                              |                |                              |                |
| <b>CONTINUOUS VARIABLES</b>                              | <b>Unit</b>           | <b>n</b>   |                      | <b>Coefficient (95CI%)</b>   | <b>p-value</b> | <b>Coefficient (95CI%)</b>   | <b>p-value</b> |
| <b>Age</b>                                               | Per year              | 71         |                      | Ref<br>0.002 (-0.001, 0.005) | 0.20           | Ref<br>0.002 (-0.001, 0.005) | 0.24           |
| <b>Time since vaccination</b>                            | Per day               | 71         |                      | Ref<br>0.000 (-0.001, 0.000) | 0.59           | Ref<br>0.000 (-0.001, 0.000) | 0.37           |
| <b>BMI</b>                                               | Per kg/m <sup>2</sup> | 70         |                      | Ref<br>0.000 (-0.003, 0.003) | 1.00           | Ref<br>0.000 (-0.003, 0.003) | 0.97           |

\* for some factors, data was missing for up to 2 participants.

\*\* adjusted for age (continuous variable), time since vaccination (continuous variable), sex and vaccine combination of the three doses (unless the covariate was the exposure variable).

\*\*\* interpretation: the coefficient is the difference in the median % response between the groups being compared, or per unit (continuous variables).

\*\*\*\* adjusted for age (continuous variable), time since vaccination (continuous variable) and sex.

**Supplementary Data on validity and completeness of questionnaire data on vaccination and infection**

The proportion of participants with self-reported primary COVID-19 vaccination also registered in the national vaccination registry, SYSVAK, was high (validity of 99·8%). Most participants registered in SYSVAK with two doses, had self-reported vaccination (completeness, 99·7%). There were 79/4551 cases of SARS-CoV-2 infection registered in the national infection registry, MSIS, by the end of June 2021 (when PCR testing and reporting was still mandatory). All self-reported cases (n=75) were also registered in MSIS.
